# Supplementary material
Source: publisher figshare collection journal article supplement (https://karger.figshare.com/ndownloader/files/23526053)
Supplement: Supplementary file 1 [file 23526053]

**Supplementary methods**

Quantification of cytokines in bronchoalveolar lavage fluid (BALF)

Levels of cytokines in BALF were measured as described previously [44]. After BALF samples were centrifuged, supernatants were frozen at -80 °C until analyzed. A multiplex assay (Eve Technologies, Calgary, Alberta, Canada) was used to assess cytokines and chemokines. The limit of detection for the cytokines and chemokines in the multiplex was 0.64 pg/mL. BALF supernatants were concentrated approximately 8-fold prior to analysis. Values shown in the Table are presented as those of the original samples prior to concentration.

**Supplementary Table**

Supplementary table 1. BALF cytokines and chemokines

Results are mean ± standard deviation (SD) of data from 6-7 mice per group. *p < 0.05 compared with control in mice with same diet, †p < 0.05 compared HDM and EM900 in mice with same diet.

**Supplementary Reference:**

47. Tashiro H, Cho Y, Kasahara DI, Brand JD, Bry L, Yeliseyev V, et al. Microbiota Contribute to Obesity-related Increases in the Pulmonary Response to Ozone. Am J Respir Cell Mol Biol. 2019 61(6):702-12.
